# Supplementary material for: Regioselective hydroesterification of alkenes and alkenylphenols utilizing CO2 and hydrosilane
Source: Royal Society of Chemistry journal article supplement (doi:10.1039/d3sc01114c), 2023-01-01

Supplementary Information

**Regioselective Hydroesterification of Alkenes and Alkenylphenols  
Utilizing CO<sub>2</sub> and Hydrosilane**

Meng-Meng Wang, ‡<sup>a, b</sup> Sheng-Mei Lu, ‡<sup>a</sup> and Can Li <sup>\*a, b</sup>

<sup>a</sup> State Key Laboratory of Catalysis, Dalian Institute of Chemical Physics, Chinese Academy of Sciences, Dalian National Laboratory for Clean Energy, Dalian 116023, China.

<sup>b</sup> University of Chinese Academy of Sciences, Beijing 100049, China.

Corresponding Author: [canli@dicp.ac.cn](mailto:canli@dicp.ac.cn).

**Table of Contents**

|                                                                                                         |     |
|---------------------------------------------------------------------------------------------------------|-----|
| 1. General information                                                                                  | S2  |
| 2. Table S1. List of catalytic systems for hydroesterification of styrene using different CO surrogates | S3  |
| 3. Synthesis of the Substrates                                                                          | S4  |
| 4. Characterization of the Substrates                                                                   | S7  |
| 5. Palladium-catalyzed Hydroesterification of Alkenes and Alkenylphenols                                | S10 |
| 6. Characterization of the Products                                                                     | S12 |
| 7. References                                                                                           | S26 |
| 8. NMR Spectra                                                                                          | S28 |

## 1. General Information

All the reagents and solvents were used as received unless otherwise specified.  $^1\text{H}$  NMR and  $^{13}\text{C}$  NMR spectra were recorded in  $\text{CDCl}_3$  on a Bruker Advance 400 (400 and 100 MHz) NMR and 700 (700 and 175 MHz) NMR spectrometer. Chemical shifts are given in ppm with reference to TMS attributed to 0 ppm and spin-spin coupling constants,  $J$ , are given in Hz. High resolution mass spectra for all the unknown compounds were done by an LTQ-Orbitrap instrument (ESI) (Thermo Fisher Scientific, USA)

## 2. Table S1 List of catalytic systems for hydroesterification of styrene using different CO surrogates

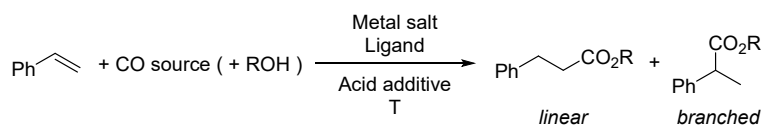

| Entry | CO source                                        | Metal salt                                                                                 | Ligand                               | Acid additive                     | T/<br>°C | Yield           | <i>l:b</i> | ref<br>in manuscript |
|-------|--------------------------------------------------|--------------------------------------------------------------------------------------------|--------------------------------------|-----------------------------------|----------|-----------------|------------|----------------------|
| 1     | CO <sub>2</sub> (balloon)                        | Pd(OAc) <sub>2</sub>                                                                       | dtbpx                                | PTSA                              | 100      | 94              | 3.8:1.0    | this work            |
| 2     | CO <sub>2</sub> (4 MPa)                          | Ru <sub>3</sub> (CO) <sub>12</sub>                                                         | [Bmim]Cl                             | /                                 | 160      | no <sup>a</sup> | /          | 48                   |
| 3     | CO <sub>2</sub> (4 MPa)                          | [Ru(CO) <sub>2</sub> Cl <sub>2</sub> ] <sub>2</sub> /<br>CO <sub>2</sub> (CO) <sub>8</sub> | [Bmin]Cl                             | /                                 | 160      | 28              | 2.0:1.0    | 49                   |
| 4     | HCO <sub>2</sub> Bn                              | Ru <sub>3</sub> (CO) <sub>12</sub>                                                         |                                      | /                                 | 135      | >99             | 1.2:1.0    | 17                   |
| 5     | HCO <sub>2</sub> Me                              | Pd(acac) <sub>2</sub>                                                                      | dtbpx                                | MeSO <sub>3</sub> H               | 100      | 54              | 8.1:1.0    | 18                   |
| 6     | <br>NFS<br>(rt, two chamber)                     | Pd(dba) <sub>2</sub>                                                                       | dtbpx                                | <i>rac</i> -BNPA                  | rt       | 80              | 6.7:1.0    | 23                   |
| 7     | (CH <sub>2</sub> ) <sub>2</sub> O/MeOH           | Pd(OAc) <sub>2</sub>                                                                       | dtbpx                                | PTSA                              | 100      | 90              | 3.5:1.0    | 22                   |
| 8     | HCO <sub>2</sub> Ph                              | Pd(OAc) <sub>2</sub>                                                                       |                                      | CH <sub>3</sub> CO <sub>2</sub> H | 90       | 92              | >20.0:1.0  | 19                   |
|       |                                                  |                                                                                            |                                      | HCO <sub>2</sub> H                |          | 92              | <1.0:20.0  |                      |
| 9     | HCO <sub>2</sub> Ph                              | Pd(OAc) <sub>2</sub>                                                                       | <br>Ar = 3,5-di- <i>t</i> Bu-4-MeOPh | /                                 | 50       | 84              | 18.0:1.0   | 20                   |
| 10    | <br>Glycerol<br>(Ir, BQ/160 °C)<br>(two chamber) | Pd(dba) <sub>2</sub>                                                                       | dtbpx                                | TFA                               | rt       | 91              | 1.0:13.0   | 16                   |
| 11    | HCO <sub>2</sub> H                               | Pd(OAc) <sub>2</sub>                                                                       |                                      | PTSA                              | 100      | 80              | 3.0:1.0    | 21                   |

<sup>a</sup> no = no this substrate. BQ = 1,4-benzoquinone. For entry 1, R = Et; for entries 2, 3, 6, 7, 10 and 11, R = Me.

### 3. Synthesis of the Substrates

#### Synthesis of alkenes **1** and alkenylphenols **7**

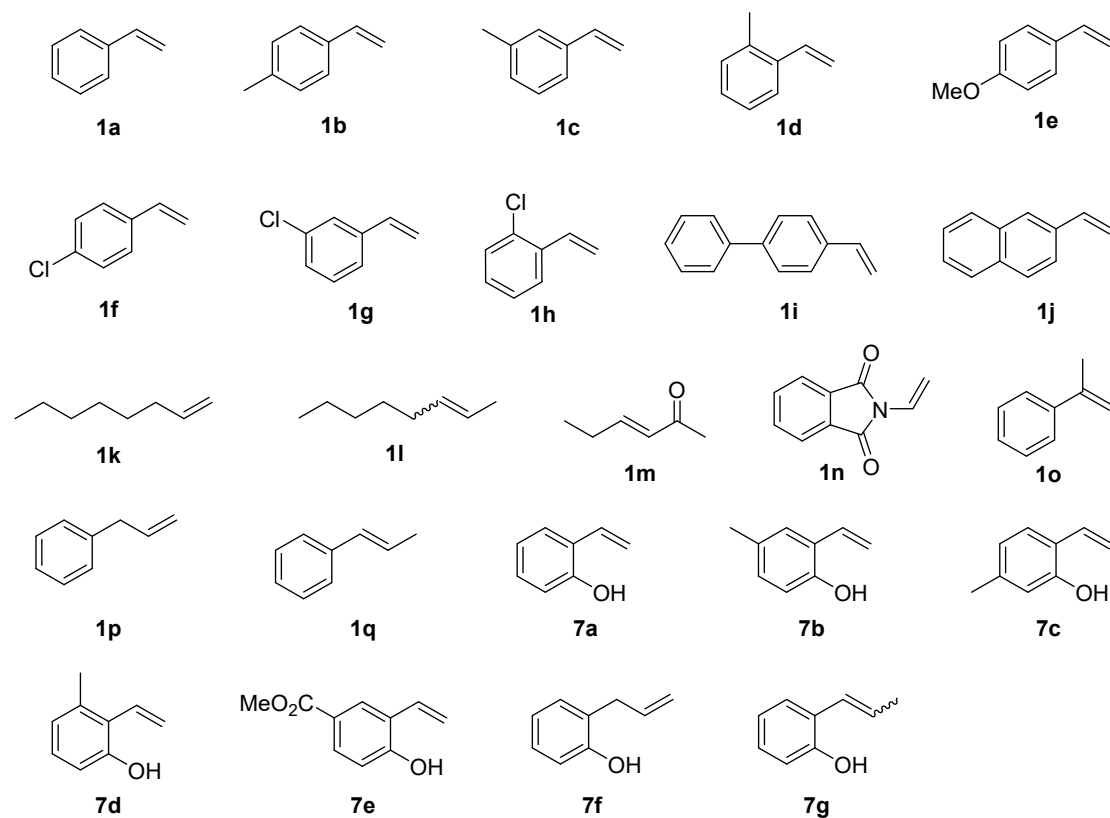

Compounds **1a-1m**, **1o-1q** and **7f** were purchased from the chemical reagent company. Compound **1n**<sup>1</sup>, **7a-7e**<sup>2</sup> and **7g**<sup>2</sup> were prepared according to the literature procedures. The preparation of new compounds and their characterization data are provided as follows.

#### Synthesis of **1n**

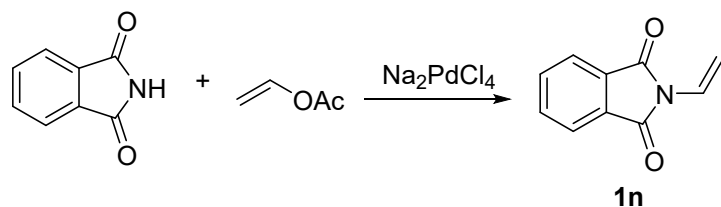

**Typical procedure A for the preparation of **1n**<sup>1</sup>:** To a stirred solution of phthalimide (0.88 g, 6.0 mmol) in vinyl acetate (15 mL, 26.8 equiv.) under argon was

added  $\text{Na}_2\text{PdCl}_4$  (17.6 mg) and the mixture was heated under reflux for 8 h. Activated charcoal (15 mg) was then added and the mixture was stirred for 10 min. It was then diluted with diethyl ether (20 mL), the solids were removed by filtration, and the filtrate was concentrated to dryness under high vacuum. The crude product was extracted with diethyl ether and the combined extracts were dried over  $\text{MgSO}_4$  and concentrated in vacuo. The residue was purified by flash column chromatography (10:1 hexane/EtOAc) to afford the product.

### Synthesis of substrates 7a-7e and 7g

#### Wittig reactions

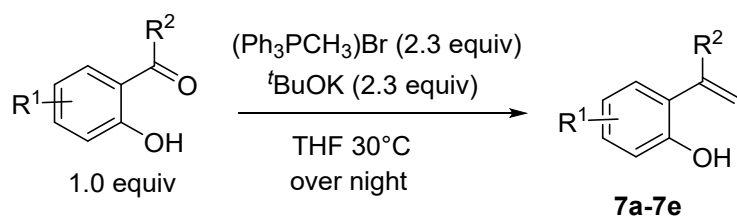

**General procedure B for the Wittig reactions<sup>2</sup>:** A flame-dried Schlenk tube was charged with methyltriphenylphosphonium bromide (8.22g, 23.0 mmol) and potassium tert-butoxide (2.58g, 23.0 mmol), which were suspended in anhydrous THF. A solution of the salicylaldehyde (10.0 mmol, 1.0 equiv) in anhydrous THF was added to the orange suspension via syringe. The reaction mixture was heated up to 30 °C and stirred overnight. The reaction mixture was quenched with saturated aqueous ammonium chloride solution and extracted with  $\text{Et}_2\text{O}$ . The combined organic layers were washed with brine, dried over  $\text{MgSO}_4$  and the solvent was removed under reduced pressure. The crude product was purified by column chromatography.

#### Synthesis of $\beta$ -methyl-vinylphenol

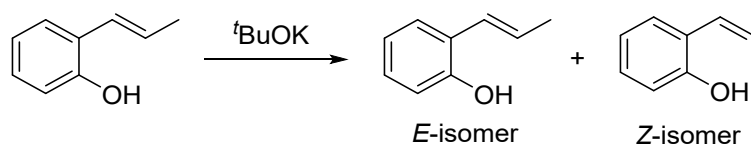

(*E*)-2-(Prop-1-en-1-yl)phenol and (*Z*)-2-(prop-1-en-1-yl)phenol (**7g**)

**Typical procedure C for the preparation of 7g<sup>2</sup>:** A flame-dried Schlenk tube was charged with potassium tert-butoxide (4.50 g, 40.0 mmol, 4.0 equiv), which was dissolved in anhydrous THF. Allylphenol (1.30 mL, 10.0 mmol, 1.0 equiv) was added via syringe and the solution was stirred at ambient temperature overnight. The reaction mixture was quenched with saturated aqueous ammonium chloride solution and extracted with Et<sub>2</sub>O (3 x 20 mL). The combined organic layers were washed with brine, dried over MgSO<sub>4</sub> and the solvent was removed under reduced pressure. The crude product was purified by column chromatography.

#### 4. Characterization of the Substrates

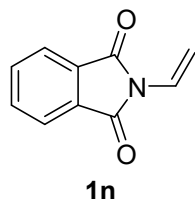

*N*-Vinylphthalimide (**1n**): The title compound was prepared by following the typical procedure A as a white solid in 97% yield. The obtained analytical data are in accordance to the literature.<sup>1</sup>

<sup>1</sup>H NMR (400 MHz, CDCl<sub>3</sub>) δ 7.95-7.65 (m, 4H), 6.88 (dd, *J* = 16.4, 9.9 Hz, 1H), 6.09 (d, *J* = 16.4 Hz, 1H), 5.05 (d, *J* = 9.9 Hz, 1H). <sup>13</sup>C NMR (100 MHz, CDCl<sub>3</sub>) δ 166.5, 134.5, 131.6, 123.8, 123.7, 104.5.

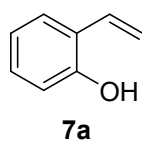

2-Vinylphenol (**7a**): The title compound was prepared by following the general procedure B as a light yellowish white solid in 95% yield. The obtained analytical data are in accordance to the literature.<sup>2</sup>

<sup>1</sup>H NMR (400 MHz, CDCl<sub>3</sub>) δ 7.38 (dd, *J* = 7.7, 1.4 Hz, 1H), 7.14 (td, *J* = 7.8, 1.6 Hz, 1H), 7.01-6.87 (m, 2H), 6.79 (d, *J* = 8.1 Hz, 1H), 5.74 (dd, *J* = 17.7, 1.2 Hz, 1H), 5.36 (dd, *J* = 11.2, 1.2 Hz, 1H), 4.98 (s, 1H). <sup>13</sup>C NMR (100 MHz, CDCl<sub>3</sub>) δ 152.7, 131.5, 128.9, 127.4, 124.8, 121.0, 115.9, 115.8.

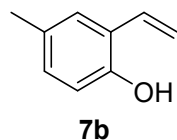

4-Methyl-2-vinylphenol (**7b**): The title compound was prepared by following the general procedure B as a light yellowish white solid in 83% yield. The obtained analytical data are in accordance to the literature.<sup>3,4</sup>

$^1\text{H}$  NMR (400 MHz,  $\text{CDCl}_3$ )  $\delta$  7.18 (s, 1H), 7.03-6.82 (m, 2H), 6.68 (d,  $J = 8.1$  Hz, 1H), 5.72 (d,  $J = 17.7$  Hz, 1H), 5.33 (d,  $J = 11.2$  Hz, 1H), 2.27 (s, 3H).  $^{13}\text{C}$  NMR (100 MHz,  $\text{CDCl}_3$ )  $\delta$  150.7, 131.6, 130.1, 129.4, 127.7, 124.5, 115.8, 115.5, 20.5.

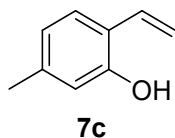

5-Methyl-2-vinylphenol (**7c**): The title compound was prepared by following the general procedure B as a white solid in 82% yield. The obtained analytical data are in accordance to the literature.<sup>2</sup>

$^1\text{H}$  NMR (700 MHz,  $\text{CDCl}_3$ )  $\delta$  7.26 (d,  $J = 7.8$  Hz, 1H), 6.89 (dd,  $J = 17.7, 11.2$  Hz, 1H), 6.73 (d,  $J = 7.8$  Hz, 1H), 6.61 (s, 1H), 5.69 (dd,  $J = 17.8, 0.9$  Hz, 1H), 5.30 (dd,  $J = 11.2, 0.9$  Hz, 1H), 4.93 (s, 1H), 2.29 (s, 3H).  $^{13}\text{C}$  NMR (175 MHz,  $\text{CDCl}_3$ )  $\delta$  152.6, 139.2, 131.4, 127.2, 122.0, 121.8, 116.5, 114.9, 21.1.

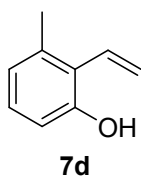

3-Methyl-2-vinylphenol (**7d**): The title compound was prepared by following the general procedure B as a light yellowish oil, which solidified in the fridge (70% yield). The obtained analytical data are in accordance to the literature.<sup>5</sup>

$^1\text{H}$  NMR (400 MHz,  $\text{CDCl}_3$ )  $\delta$  7.03 (t,  $J = 7.8$  Hz, 1H), 6.74 (dd,  $J = 13.2, 7.9$  Hz, 2H), 6.66 (dd,  $J = 18.2, 11.7$  Hz, 1H), 5.77-5.43 (m, 3H), 2.24 (s, 3H).  $^{13}\text{C}$  NMR (100 MHz,  $\text{CDCl}_3$ )  $\delta$  152.8, 137.3, 132.3, 128.3, 124.0, 122.0, 120.5, 113.1, 20.2. HRMS (ESI+,  $m/z$ ): calculated for  $\text{C}_9\text{H}_{11}\text{O}$  [ $\text{M}+\text{H}$ ]<sup>+</sup> 135.0810; found 135.0806.

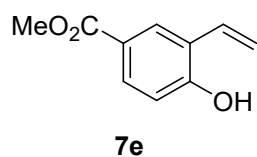



Methyl 4-hydroxy-3-vinylbenzoate (**7e**): The title compound was prepared by following the general procedure B as a light yellowish solid in 78% yield. The obtained analytical data are in accordance to the literature.<sup>2,4,6</sup>

<sup>1</sup>H NMR (400 MHz, CDCl<sub>3</sub>) δ 8.13 (d, *J* = 1.5 Hz, 1H), 7.82 (dd, *J* = 8.4, 1.9 Hz, 1H), 7.16 (d, *J* = 2.4 Hz, 1H), 6.97 (dd, *J* = 17.7, 11.2 Hz, 1H), 6.89 (d, *J* = 8.5 Hz, 1H), 5.82 (d, *J* = 17.7 Hz, 1H), 5.37 (d, *J* = 11.2 Hz, 1H), 3.92 (s, 3H). <sup>13</sup>C NMR (100 MHz, CDCl<sub>3</sub>) δ 167.9, 157.8, 130.7, 130.7, 129.3, 125.0, 122.0, 116.5, 115.8, 52.3.

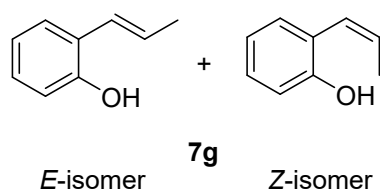

(*E*)-2-(Prop-1-en-1-yl)phenol and (*Z*)-2-(prop-1-en-1-yl)phenol (**7g**): The title compound was prepared by following the typical procedure C as a colorless oil in 90% yield (*E/Z* = 77/23). The obtained analytical data are in accordance to the literature.<sup>2</sup>

*E*-isomer:

<sup>1</sup>H NMR (400 MHz, CDCl<sub>3</sub>) δ 7.29 (dd, *J* = 7.7, 1.5 Hz, 1H), 7.14-7.04 (m, 1H), 6.95-6.84 (m, 1H), 6.78 (dd, *J* = 8.0, 1.0 Hz, 1H), 6.58 (dd, *J* = 15.9, 1.6 Hz, 1H), 6.20 (dq, *J* = 15.8, 6.6 Hz, 1H), 5.05 (s, 1H), 1.91 (dd, *J* = 6.6, 1.7 Hz, 3H). <sup>13</sup>C NMR (100 MHz, CDCl<sub>3</sub>) δ 152.3, 128.4, 128.0, 127.4, 125.3, 124.0, 120.9, 115.7, 19.0.

*Z*-isomer:

<sup>1</sup>H NMR (400 MHz, CDCl<sub>3</sub>) δ 7.21-7.15 (m, 1H), 7.14-7.04 (m, 1H), 6.95-6.84 (m, 2H), 6.39 (dt, *J* = 10.4, 5.2 Hz, 1H), 6.02 (dq, *J* = 11.2, 7.0 Hz, 1H), 5.28 (s, 1H), 1.72 (dd, *J* = 7.0, 1.8 Hz, 3H). <sup>13</sup>C NMR (100 MHz, CDCl<sub>3</sub>) δ 152.6, 131.3, 129.7, 128.6, 125.1, 123.5, 120.3, 115.1, 14.6.

## 5. Palladium-catalyzed Hydroesterification of Alkenes and Alkenylphenols

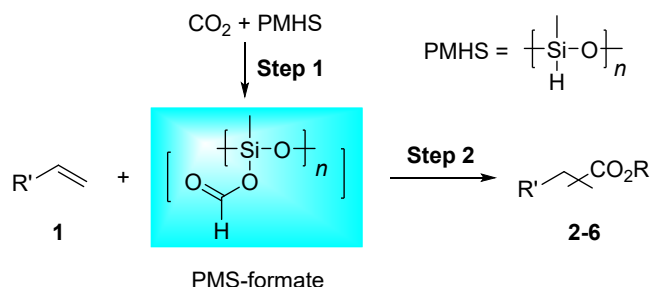

**General procedure I for the intermolecular hydroesterification of alkenes utilizing CO<sub>2</sub> and PMHS:** A 35 mL Schlenk tube equipped with a magnetic stir bar was fitted with a balloon filled with CO<sub>2</sub>. The tube was charged with Cu(OAc)<sub>2</sub> (0.01 mmol, 1.0 mol%), dppbz (0.015 mmol, 1.5 mol%), and a solution of PMHS (Acros, *FW*: ca. 1900, 0.165 g, Si-H, 2.5 mmol, 2.5 equiv) in dry 1,4-dioxane (0.5 mL). The tube was then flushed with CO<sub>2</sub>. After that, the tube was tightly sealed under the balloon pressure of CO<sub>2</sub> and stirred at 65 °C for 30 min. A yellow solution was obtained. Once completed, the tube containing the silyl formate solution was removed from the oil bath. Then, dry ROH (MeOH, EtOH, *n*-PrOH, *i*-PrOH or *t*-BuOH, 4 mL), **1** (1.0 mmol, 1.0 equiv), Pd(acac)<sub>2</sub> (2.5 mol%) or Pd(OAc)<sub>2</sub> (2.5 mol%), dtbpx (10 mol%), PTSA (20 mol%) were added sequentially under CO<sub>2</sub> atmosphere. After that, CO<sub>2</sub> balloon was removed, and the Schlenk tube was tightly sealed and stirred at 100 °C for 16-24 h or 60 °C for 48 h. After the reaction mixture was cooled to room temperature, the solvent was concentrated in vacuo. Purification of the residue by flash column chromatography to afford the ester products **2-6**.

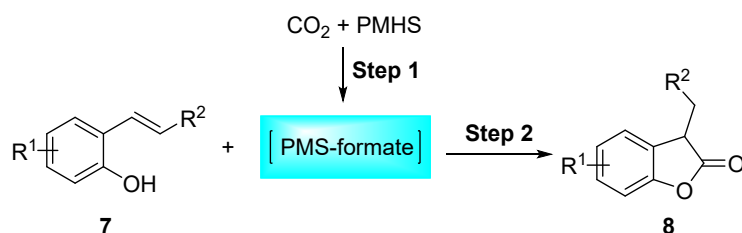

**General procedure II for the intramolecular hydroesterification of alkenylphenols utilizing CO<sub>2</sub> and PMHS:** A 35 mL Schlenk tube equipped with a magnetic stir bar was fitted with a balloon filled with CO<sub>2</sub>. The tube was charged with Cu(OAc)<sub>2</sub> (0.005 mmol, 1.0 mol%), dppbz (0.0075 mmol, 1.5 mol%), and a solution of PMHS (Acros, *FW*: ca. 1900, 0.083 g, Si-H, 1.25 mmol, 2.5 equiv) in dry 1,4-dioxane (0.5 mL). The tube was then flushed with CO<sub>2</sub>. After that, the tube was tightly sealed at balloon pressure of CO<sub>2</sub>, and stirred at 65 °C for 30 min, resulting in a yellow solution. Once completed, the tube containing the silyl formate solution was removed from the oil bath. Then, dry toluene (4 mL), alkenylphenol **7** (0.5 mmol, 1.0 equiv), Pd(acac)<sub>2</sub> (2.5 mol%), dtbpx (10 mol%) and PTSA (20 mol%) were added sequentially under CO<sub>2</sub> atmosphere. After that, CO<sub>2</sub> balloon was removed, and the Schlenk tube was tightly sealed and stirred at 60 °C for 48 h or 100 °C for 16-24 h. After the reaction mixture was cooled to room temperature, the solvent was concentrated in vacuo. Purification of the residue by flash column chromatography to afford the lactone products **8**.

## 6. Characterization of the Products

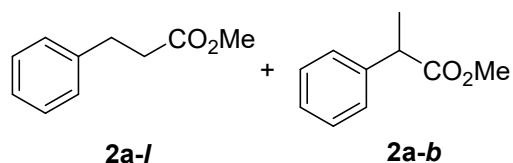

**Methyl 3-phenylpropanoate (2a-l) and methyl 2-phenylpropanoate (2a-b)** (Table 1, entry 1): From styrene (**1a**) (104.2 mg, 1.0 mmol), the title compound was prepared by following the general procedure I (100 °C, 16 h, Pd(OAc)<sub>2</sub>, MeOH) as a yellow oil (151.1 mg, 92% yield, *l/b* = 2.7/1.0). The spectroscopic data correspond to those previously reported in the literature.

### **2a-l:**<sup>7,8</sup>

<sup>1</sup>H NMR (400 MHz, CDCl<sub>3</sub>) δ 7.43-7.11 (m, 5H), 3.67 (s, 3H), 2.95 (t, *J* = 7.9 Hz, 2H), 2.63 (t, *J* = 7.9 Hz, 2H). <sup>13</sup>C NMR (100 MHz, CDCl<sub>3</sub>) δ 173.4, 140.5, 128.5, 128.3, 126.3, 51.6, 35.7, 31.0.

### **2a-b:**<sup>9-11</sup>

<sup>1</sup>H NMR (400 MHz, CDCl<sub>3</sub>) δ 7.43-7.11 (m, 5H), 3.72 (q, *J* = 7.2 Hz, 1H), 3.66 (s, 3H), 1.50 (d, *J* = 7.2 Hz, 3H). <sup>13</sup>C NMR (100 MHz, CDCl<sub>3</sub>) δ 175.0, 140.6, 128.6, 127.5, 127.2, 52.0, 45.4, 18.6.

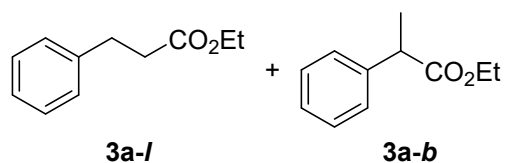

**Ethyl 3-phenylpropanoate (3a-l) and ethyl 2-phenylpropanoate (3a-b)** (Table 1, entry 2): From styrene (**1a**) (104.2 mg, 1.0 mmol), the title compound was prepared by following the general procedure I (100 °C, 16 h, Pd(OAc)<sub>2</sub>, EtOH) as a yellow oil (167.5 mg, 94% yield, *l/b* = 3.8/1.0). The spectroscopic data correspond to those previously reported in the literature.

### **3a-l:**<sup>7,12,13</sup>

$^1\text{H}$  NMR (400 MHz,  $\text{CDCl}_3$ )  $\delta$  7.35-7.16 (m, 5H), 4.12 (q,  $J = 7.2$  Hz, 2H), 2.95 (t,  $J = 7.8$  Hz, 2H), 2.62 (t,  $J = 7.8$  Hz, 2H), 1.23 (t,  $J = 7.1$  Hz, 3H).  $^{13}\text{C}$  NMR (100 MHz,  $\text{CDCl}_3$ )  $\delta$  172.9, 140.6, 128.5, 128.3, 126.2, 60.4, 36.0, 31.0, 14.2.

**3a-b:**<sup>10,14,15</sup>

$^1\text{H}$  NMR (400 MHz,  $\text{CDCl}_3$ )  $\delta$  7.35-7.15 (m, 5H), 4.20-4.05 (m, 2H), 3.70 (q,  $J = 7.2$  Hz, 1H), 1.49 (d,  $J = 7.2$  Hz, 3H), 1.22-1.17 (m, 3H).  $^{13}\text{C}$  NMR (100 MHz,  $\text{CDCl}_3$ )  $\delta$  174.6, 140.7, 128.6, 127.5, 127.1, 60.7, 45.6, 18.6, 14.1.

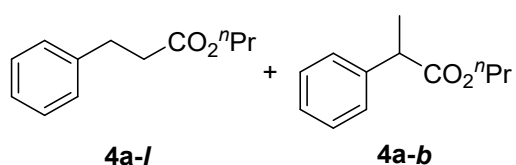

**Propyl 3-phenylpropanoate (4a-l) and propyl 2-phenylpropanoate (4a-b)** (Table 1, entry 3): From styrene (**1a**) (104.2 mg, 1.0 mmol), the title compound was prepared by following the general procedure I (100 °C, 16 h,  $\text{Pd}(\text{OAc})_2$ ,  $n\text{PrOH}$ ) as a yellow oil (96.1 mg, 50% yield,  $l/b = 2.3/1.0$ ). The spectroscopic data correspond to those previously reported in the literature.

**4a-l:**<sup>16</sup>

$^1\text{H}$  NMR (400 MHz,  $\text{CDCl}_3$ )  $\delta$  7.35-7.16 (m, 5H), 4.03 (t,  $J = 6.7$  Hz, 2H), 3.02-2.89 (m, 2H), 2.69-2.58 (m, 2H), 1.69-1.55 (m, 2H), 0.91 (t,  $J = 7.4$  Hz, 3H).  $^{13}\text{C}$  NMR (100 MHz,  $\text{CDCl}_3$ )  $\delta$  173.1, 140.6, 128.5, 128.3, 126.2, 66.1, 36.0, 31.0, 22.0, 10.4.

**4a-b:**<sup>17</sup>

$^1\text{H}$  NMR (400 MHz,  $\text{CDCl}_3$ )  $\delta$  7.38-7.14 (m, 5H), 4.02 (t,  $J = 6.7$  Hz, 2H), 3.72 (q,  $J = 7.2$  Hz, 1H), 1.64-1.53 (m, 2H), 1.50 (d,  $J = 7.2$  Hz, 3H), 0.85 (t,  $J = 7.4$  Hz, 3H).  $^{13}\text{C}$  NMR (100 MHz,  $\text{CDCl}_3$ )  $\delta$  174.6, 140.7, 128.6, 127.5, 127.1, 66.3, 45.6, 21.9, 18.5, 10.3.

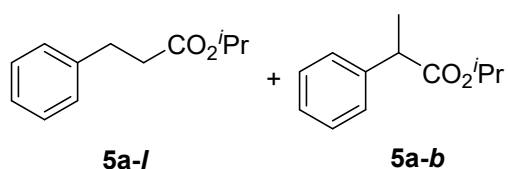

**Isopropyl 3-phenylpropanoate (5a-l) and isopropyl 2-phenylpropanoate (5a-b)** (Table 1, entry 4): From styrene (**1a**) (104.2 mg, 1.0 mmol), the title compound was prepared by following the general procedure I (100 °C, 16 h, Pd(OAc)<sub>2</sub>, *i*PrOH) as a yellow oil (38.4 mg, 20% yield, *l/b* = 4.5/1.0). The spectroscopic data correspond to those previously reported in the literature.

**5a-l**:<sup>7,10,18</sup>

<sup>1</sup>H NMR (400 MHz, CDCl<sub>3</sub>) δ 7.33-7.24 (m, 2H), 7.24-7.16 (m, 3H), 5.00 (dt, *J* = 12.5, 6.3 Hz, 1H), 2.99-2.89 (m, 2H), 2.63-2.55 (m, 2H), 1.20 (d, *J* = 6.3 Hz, 2H). <sup>13</sup>C NMR (100 MHz, CDCl<sub>3</sub>) δ 172.5, 140.6, 128.5, 128.3, 126.2, 67.7, 36.3, 31.1, 21.8.

**5a-b**:<sup>10</sup>

<sup>1</sup>H NMR (400 MHz, CDCl<sub>3</sub>) δ 7.37-7.15 (m, 5H), 5.06-4.89 (m, 1H), 3.67 (q, *J* = 7.2 Hz, 1H), 1.48 (d, *J* = 7.2 Hz, 3H), 1.23-1.18 (m, 3H), 1.13 (d, *J* = 6.2 Hz, 3H). <sup>13</sup>C NMR (100 MHz, CDCl<sub>3</sub>) δ 58.5, 18.4.

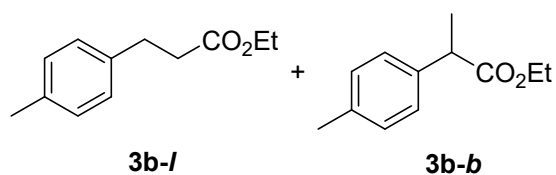

**Ethyl 3-(p-tolyl)propanoate (3b-l) and ethyl 2-(p-tolyl)propanoate (3b-b)** (Table 4, entry 2): From 4-methylstyrene (**1b**) (118.2 mg, 1.0 mmol), the title compound was prepared by following the general procedure I (100 °C, 16 h, Pd(OAc)<sub>2</sub>, EtOH) as a yellow oil (174.9 mg, 91% yield, *l/b* = 4.3/1.0). The spectroscopic data correspond to those previously reported in the literature.

**3b-l**:<sup>19</sup>

$^1\text{H}$  NMR (400 MHz,  $\text{CDCl}_3$ )  $\delta$  7.23-6.90 (m, 4H), 4.12 (q,  $J = 7.1$  Hz, 2H), 2.91 (t,  $J = 7.8$  Hz, 2H), 2.59 (t,  $J = 7.8$  Hz, 2H), 2.31 (s, 3H), 1.24 (t,  $J = 7.0$  Hz, 3H).  $^{13}\text{C}$  NMR (100 MHz,  $\text{CDCl}_3$ )  $\delta$  173.0, 137.5, 135.7, 129.2, 128.2, 60.4, 36.1, 30.6, 21.0, 14.2.

**3b-b:**<sup>15,20</sup>

$^1\text{H}$  NMR (400 MHz,  $\text{CDCl}_3$ )  $\delta$  7.22-6.93 (m, 4H), 4.18-4.03 (m, 2H), 3.66 (q,  $J = 7.2$  Hz, 1H), 2.32 (s, 3H), 1.47 (d,  $J = 7.1$  Hz, 2H), 1.23-1.17 (m, 3H).  $^{13}\text{C}$  NMR (100 MHz,  $\text{CDCl}_3$ )  $\delta$  129.3, 127.3, 60.7, 45.2, 21.0, 18.7, 14.1.

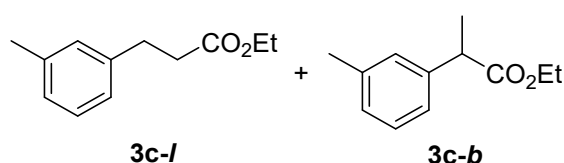

**Ethyl 3-(*m*-tolyl)propanoate (3c-l) and ethyl 2-(*m*-tolyl)propanoate (3c-b)** (Table 4, entry 3): From 3-methylstyrene (**1c**) (118.2 mg, 1.0 mmol), the title compound was prepared by following the general procedure I (100 °C, 16 h,  $\text{Pd}(\text{OAc})_2$ , EtOH) as a yellow oil (169.2 mg, 88% yield,  $l/b = 3.8/1.0$ ). The spectroscopic data correspond to those previously reported in the literature.

**3c-l:**<sup>21</sup>

$^1\text{H}$  NMR (400 MHz,  $\text{CDCl}_3$ )  $\delta$  7.30-6.93 (m, 4H), 4.22-4.03 (m, 2H), 2.91 (t,  $J = 7.9$  Hz, 2H), 2.60 (t,  $J = 7.9$  Hz, 2H), 2.32 (s, 3H), 1.23 (t,  $J = 7.1$  Hz, 3H).  $^{13}\text{C}$  NMR (100 MHz,  $\text{CDCl}_3$ )  $\delta$  173.0, 140.6, 138.0, 129.1, 128.4, 127.0, 125.3, 60.4, 36.0, 30.9, 21.4, 14.2.

**3c-b:**<sup>22-24</sup>

$^1\text{H}$  NMR (400 MHz,  $\text{CDCl}_3$ )  $\delta$  7.27-6.96 (m, 4H), 4.20-4.03 (m, 2H), 3.66 (q,  $J = 7.1$  Hz, 1H), 2.34 (s, 3H), 1.48 (d,  $J = 7.1$  Hz, 3H), 1.21 (t,  $J = 7.1$  Hz, 3H).  $^{13}\text{C}$  NMR (100 MHz,  $\text{CDCl}_3$ )  $\delta$  174.7, 140.7, 138.2, 128.5, 128.2, 127.8, 124.5, 60.7, 45.5, 21.4, 18.7, 14.1.

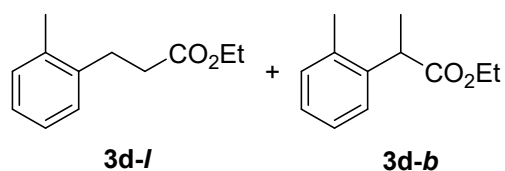

**Ethyl 3-(*o*-tolyl)propanoate (3d-l) and ethyl 2-(*o*-tolyl)propanoate (3d-b)** (Table 4, entry 4): From 2-methylstyrene (**1d**) (118.2 mg, 1.0 mmol), the title compound was prepared by following the general procedure I (100 °C, 16 h, Pd(OAc)<sub>2</sub>, EtOH) as a yellow oil (178.0 mg, 93% yield, *l/b* = 10.1/1.0). The spectroscopic data correspond to those previously reported in the literature.

**3d-l:**<sup>25</sup>

<sup>1</sup>H NMR (400 MHz, CDCl<sub>3</sub>) δ 7.19-7.07 (m, 4H), 4.14 (q, *J* = 7.1 Hz, 2H), 2.99-2.90 (m, 2H), 2.64-2.53 (m, 2H), 2.33 (s, 3H), 1.25 (t, *J* = 7.1 Hz, 3H). <sup>13</sup>C NMR (100 MHz, CDCl<sub>3</sub>) δ 173.1, 138.7, 136.0, 130.3, 128.5, 126.4, 126.1, 60.5, 34.7, 28.4, 19.3, 14.2.

**3d-b:**<sup>22,23</sup>

<sup>1</sup>H NMR (400 MHz, CDCl<sub>3</sub>) δ 7.21-7.03 (m, 4H), 4.14-4.03 (m, 2H), 3.94 (dd, *J* = 14.4, 7.2 Hz, 1H), 2.37 (s, 3H), 1.46 (d, *J* = 7.1 Hz, 3H), 1.20 (t, *J* = 7.2 Hz, 3H).

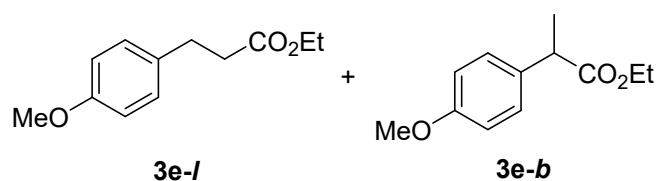

**Ethyl 3-(4-methoxyphenyl)propanoate (3e-l) and ethyl 2-(4-methoxyphenyl)propanoate (3e-b)** (Table 4, entry 5): From 4-methoxystyrene (**1e**) (134.2 mg, 1.0 mmol), the title compound was prepared by following the general procedure I (100 °C, 16 h, Pd(OAc)<sub>2</sub>, EtOH) as a yellow oil (83.3 mg, 35% yield, *l/b* = 4.9/1.0). The spectroscopic data correspond to those previously reported in the literature.

**3e-l:**<sup>7,13</sup>



$^1\text{H}$  NMR (400 MHz,  $\text{CDCl}_3$ )  $\delta$  7.12 (d,  $J = 8.2$  Hz, 2H), 6.83 (d,  $J = 8.2$  Hz, 2H), 4.12 (q,  $J = 7.1$  Hz, 2H), 3.78 (s, 3H), 2.89 (t,  $J = 7.8$  Hz, 2H), 2.58 (t,  $J = 7.8$  Hz, 2H), 1.23 (t,  $J = 7.1$  Hz, 3H).  $^{13}\text{C}$  NMR (100 MHz,  $\text{CDCl}_3$ )  $\delta$  173.0, 158.1, 132.7, 129.3, 113.9, 60.4, 55.3, 36.3, 30.1, 14.2.

**3e-b:**<sup>23,24,26</sup>

$^1\text{H}$  NMR (400 MHz,  $\text{CDCl}_3$ )  $\delta$  7.23 (d,  $J = 8.3$  Hz, 2H), 6.90-6.80 (m, 2H), 4.12 (q,  $J = 7.1$  Hz, 2H), 3.78 (s, 3H), 3.65 (q,  $J = 7.1$  Hz, 1H), 1.47 (d,  $J = 7.1$  Hz, 3H), 1.23-1.17 (m, 3H).  $^{13}\text{C}$  NMR (100 MHz,  $\text{CDCl}_3$ )  $\delta$  174.8, 158.6, 132.8, 128.5, 114.0, 60.7, 55.3, 44.7, 18.7, 14.2.

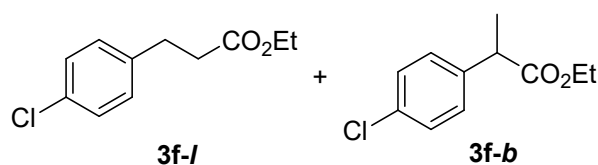

**Ethyl 3-(4-chlorophenyl)propanoate (3f-l) and ethyl 2-(4-chlorophenyl)propanoate (3f-b)** (Table 4, entry 6): From 4-chlorostyrene (**1f**) (138.6 mg, 1.0 mmol), the title compound was prepared by following the general procedure I (60 °C, 48 h,  $\text{Pd}(\text{OAc})_2$ , EtOH) as a yellow oil (168.0 mg, 79% yield,  $l/b = 1.0/2.1$ ). The spectroscopic data correspond to those previously reported in the literature.

**3f-l:**<sup>27-29</sup>

$^1\text{H}$  NMR (400 MHz,  $\text{CDCl}_3$ )  $\delta$  7.33-7.19 (m, 2H), 7.13 (d,  $J = 8.0$  Hz, 2H), 4.22-4.02 (m, 2H), 2.92 (t,  $J = 7.7$  Hz, 2H), 2.59 (t,  $J = 7.7$  Hz, 2H), 1.30-1.20 (m, 3H).  $^{13}\text{C}$  NMR (100 MHz,  $\text{CDCl}_3$ )  $\delta$  172.6, 139.0, 132.0, 129.7, 128.6, 60.5, 35.8, 30.3, 14.2.

**3f-b:**<sup>23</sup>

$^1\text{H}$  NMR (400 MHz,  $\text{CDCl}_3$ )  $\delta$  7.33-7.19 (m, 4H), 4.22-4.00 (m, 2H), 3.68 (q,  $J = 7.1$  Hz, 1H), 1.47 (d,  $J = 7.2$  Hz, 2H), 1.20 (t,  $J = 7.2$  Hz, 3H).  $^{13}\text{C}$  NMR (100 MHz,  $\text{CDCl}_3$ )  $\delta$  174.1, 139.1, 132.9, 128.9, 128.7, 60.9, 45.0, 18.5, 14.1.

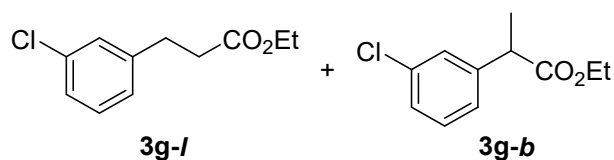

**Ethyl 3-(3-chlorophenyl)propanoate (3g-l) and ethyl 2-(3-chlorophenyl)propanoate (3g-b)** (Table 4, entry 7): From 3-chlorostyrene (**1g**) (138.6 mg, 1.0 mmol), the title compound was prepared by following the general procedure I (60 °C, 48 h, Pd(acac)<sub>2</sub>, EtOH) as a yellow oil (178.6 mg, 84% yield, *l/b* = 1.0/2.1). The spectroscopic data correspond to those previously reported in the literature.

**3g-l:**<sup>30</sup>

<sup>1</sup>H NMR (400 MHz, CDCl<sub>3</sub>) δ 7.34-7.04 (m, 4H), 4.28-4.08 (m, 2H), 2.93 (t, *J* = 7.7 Hz, 2H), 2.61 (t, *J* = 7.7 Hz, 2H), 1.21 (t, *J* = 7.2 Hz, 3H). <sup>13</sup>C NMR (100 MHz, CDCl<sub>3</sub>) δ 172.5, 142.6, 134.2, 129.7, 128.5, 126.6, 126.5, 60.5, 35.6, 30.6, 14.2.

**3g-b:**<sup>22</sup>

<sup>1</sup>H NMR (400 MHz, CDCl<sub>3</sub>) δ 7.34-7.16 (m, 4H), 4.28-4.08 (m, 2H), 3.67 (q, *J* = 7.2 Hz, 1H), 1.48 (d, *J* = 7.2 Hz, 3H), 1.23 (t, *J* = 7.2 Hz, 3H). <sup>13</sup>C NMR (100 MHz, CDCl<sub>3</sub>) δ 173.9, 142.6, 134.4, 129.8, 127.8, 127.3, 125.7, 61.0, 45.3, 18.5, 14.1.

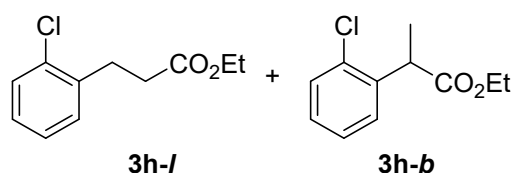

**Ethyl 3-(2-chlorophenyl)propanoate (3h-l) and ethyl 2-(2-chlorophenyl)propanoate (3h-b)** (Table 4, entry 8): From 2-chlorostyrene (**1h**) (138.6 mg, 1.0 mmol), the title compound was prepared by following the general procedure I (60 °C, 48 h, Pd(acac)<sub>2</sub>, EtOH) as a yellow oil (172.3 mg, 81% yield, *l/b* = 4.9/1.0). The spectroscopic data correspond to those previously reported in the literature.

For **3h-l:**<sup>30</sup>

<sup>1</sup>H NMR (400 MHz, CDCl<sub>3</sub>) <sup>1</sup>H NMR (400 MHz, CDCl<sub>3</sub>) δ 7.39-7.29 (m, 1H), 7.28-7.21 (m, 1H), 7.21-7.10 (m, 2H), 4.13 (q, *J* = 7.1 Hz, 2H), 3.08-3.03 (m, 1H), 2.66-2.61 (m, 1H), 1.23 (t, *J* = 7.2 Hz, 3H). <sup>13</sup>C NMR (100 MHz, CDCl<sub>3</sub>) δ 172.7, 138.1, 134.0, 130.5, 129.6, 127.8, 126.9, 60.5, 34.0, 29.0, 14.2.

Minor signals from **3h-b**:

<sup>1</sup>H NMR (400 MHz, CDCl<sub>3</sub>) <sup>1</sup>H NMR (400 MHz, CDCl<sub>3</sub>) δ 7.38-7.12 (m, 4H), 4.23-4.16 (m, 1H), 4.16-4.10 (m, 2H), 1.49 (d, *J* = 7.2 Hz, 3H), 1.21 (t, *J* = 7.1 Hz, 3H). <sup>13</sup>C NMR (100 MHz, CDCl<sub>3</sub>) δ 174.0, 138.6, 133.7, 129.6, 128.4, 128.2, 127.1, 60.9, 42.2, 17.6, 14.1.

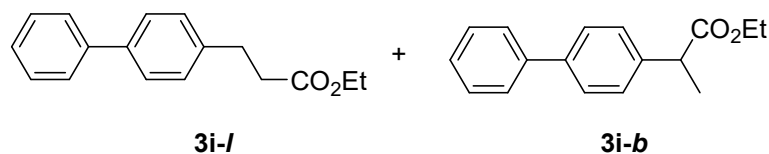

**Ethyl 3-([1,1'-biphenyl]-4-yl)propanoate (3i-l) and ethyl 2-([1,1'-biphenyl]-4-yl)propanoate (3i-b)** (Table 4, entry 9): From 4-vinylbiphenyl (**1i**) (180.2 mg, 1.0 mmol), the title compound was prepared by following the general procedure I (100 °C, 24 h, Pd(OAc)<sub>2</sub>, EtOH) as a yellow oil (203.4 mg, 80% yield, *l/b* = 2.3/1.0). The spectroscopic data correspond to those previously reported in the literature.

For **3i-l**:<sup>30,31</sup>

<sup>1</sup>H NMR (400 MHz, CDCl<sub>3</sub>) δ 7.54 (dd, *J* = 21.2, 7.7 Hz, 4H), 7.42 (t, *J* = 7.4 Hz, 2H), 7.35-7.22 (m, 3H), 4.14 (q, *J* = 7.1 Hz, 2H), 2.99 (t, *J* = 7.8 Hz, 2H), 2.66 (t, *J* = 7.8 Hz, 2H), 1.24 (t, *J* = 7.0 Hz, 3H). <sup>13</sup>C NMR (100 MHz, CDCl<sub>3</sub>) δ 172.9, 141.0, 139.7, 139.2, 128.8, 128.8, 127.2, 127.1, 127.0, 60.5, 35.9, 30.6, 14.2.

minor signals from **3i-b**:<sup>24</sup>

<sup>1</sup>H NMR (400 MHz, CDCl<sub>3</sub>) δ 7.64-7.20 (m, 9H), 4.22-4.08 (m, 2H), 3.75 (q, *J* = 7.1 Hz, 1H), 1.53 (d, *J* = 7.1 Hz, 3H), 1.29-1.20 (m, 3H). <sup>13</sup>C NMR (100 MHz, CDCl<sub>3</sub>) δ 174.6, 140.8, 140.0, 139.8, 128.5, 127.9, 127.4, 127.3, 127.1, 60.8, 45.3, 18.7, 14.2.

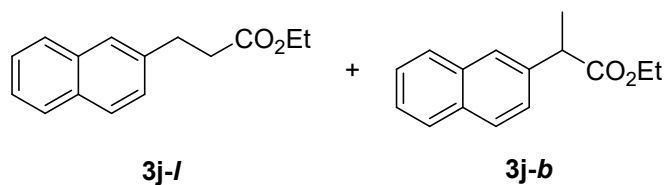

**Ethyl 2-(naphthalen-2-yl)propanoate (3j-l) and ethyl 3-(naphthalen-2-yl)propanoate (3j-b)** (Table 4, entry 10): From 2-vinylnaphthalene (**1j**) (154.2 mg, 1.0 mmol), the title compound was prepared by following the general procedure I (100 °C, 24 h, Pd(acac)<sub>2</sub>) as a yellow oil (153.0 mg, 67% yield, *l/b* = 2.8/1.0). The spectroscopic data correspond to those previously reported in the literature.

For **3j-l**:<sup>30</sup>

<sup>1</sup>H NMR (400 MHz, CDCl<sub>3</sub>) δ 7.86-7.76 (m, 3H), 7.67 (s, 1H), 7.52-7.42 (m, 2H), 7.37 (dd, *J* = 8.4, 1.3 Hz, 1H), 4.16 (q, *J* = 7.1 Hz, 2H), 3.14 (t, *J* = 7.8 Hz, 2H), 2.74 (t, *J* = 7.8 Hz, 2H), 1.26 (t, *J* = 7.1 Hz, 3H). <sup>13</sup>C NMR (100 MHz, CDCl<sub>3</sub>) δ 172.9, 138.1, 133.6, 132.1, 128.1, 127.6, 127.5, 127.0, 126.5, 126.0, 125.4, 60.4, 35.9, 31.1, 14.2.

minor signals from **3j-b**:<sup>24</sup>

<sup>1</sup>H NMR (400 MHz, CDCl<sub>3</sub>) δ 7.90-7.30 (m, 7H), 4.24-4.08 (m, 2H), 3.90 (q, *J* = 7.1 Hz, 1H), 1.62 (d, *J* = 7.2 Hz, 3H), 1.35-1.15 (m, 3H). <sup>13</sup>C NMR (100 MHz, CDCl<sub>3</sub>) δ 174.6, 138.2, 133.5, 132.6, 128.3, 127.8, 127.7, 127.1, 126.2, 126.1, 125.8, 60.9, 45.7, 18.7, 14.2.

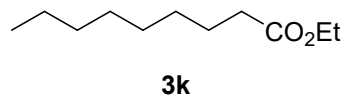

**Ethyl nonanoate (3k)** (Table 5, entries 1-2): From 1-octene (**1k**) or *cis, trans*-2-octene (**1l**) (112.2 mg, 1.0 mmol), the title compound was prepared by following the general procedure I (100 °C, 24 h, Pd(acac)<sub>2</sub>, EtOH) as a colorless oil in 98% yield for **1k** (182.6 mg) or in 95% yield for **1l** (177.0 mg). The spectroscopic data correspond to those previously reported in the literature.<sup>30</sup>

$^1\text{H}$  NMR (400 MHz,  $\text{CDCl}_3$ )  $\delta$  4.12 (q,  $J = 7.1$  Hz, 2H), 2.28 (t,  $J = 7.5$  Hz, 2H), 1.68-1.55 (m, 2H), 1.26 (m, 13H), 0.88 (t,  $J = 6.2$  Hz, 3H).  $^{13}\text{C}$  NMR (100 MHz,  $\text{CDCl}_3$ )  $\delta$  173.9, 60.1, 34.4, 31.8, 29.2, 29.2, 29.1, 25.0, 22.6, 14.3, 14.1.

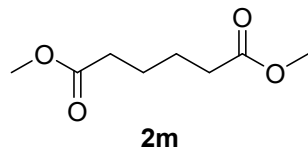

**Dimethyl adipate (2m)** (Table 5, entry 3): From Methyl 2-pentenoate (**1m**) (114.1 mg, 1.0 mmol), the title compound was prepared by following the general procedure I (100 °C, 24 h,  $\text{Pd}(\text{acac})_2$ , MeOH) as a colorless oil in 75% yield (128.9 mg). The spectroscopic data correspond to those previously reported in the literature.<sup>32</sup>

$^1\text{H}$  NMR (400 MHz,  $\text{CDCl}_3$ )  $\delta$  3.67 (s, 6H), 2.46-2.25 (m, 4H), 1.73-1.62 (m, 4H).  $^{13}\text{C}$  NMR (100 MHz,  $\text{CDCl}_3$ )  $\delta$  173.7, 51.5, 33.6, 24.3.

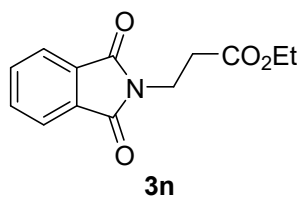

**Ethyl 3-phenylbutanoate (3n)** (Table 5, entry 4): From 1-N-vinylphthalimide (**1n**) (86.6 mg, 0.5 mmol), the title compound was prepared by following the general procedure I (100 °C, 24 h,  $\text{Pd}(\text{acac})_2$ , EtOH) as a white solid in 96% yield (118.7 mg). The spectroscopic data correspond to those previously reported in the literature.<sup>30</sup>

$^1\text{H}$  NMR (400 MHz,  $\text{CDCl}_3$ )  $\delta$  7.90-7.81 (m, 2H), 7.78-7.67 (m, 2H), 4.13 (q,  $J = 7.1$  Hz, 2H), 4.00 (t,  $J = 7.2$  Hz, 2H), 2.73 (t,  $J = 7.2$  Hz, 2H), 1.23 (t,  $J = 7.1$  Hz, 3H).  $^{13}\text{C}$  NMR (100 MHz,  $\text{CDCl}_3$ )  $\delta$  170.8, 168.0, 134.0, 132.1, 123.3, 60.8, 33.8, 33.0, 14.1.

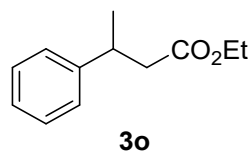

**Ethyl 3-phenylbutanoate (3o)** (Table 5, entry 5): From 2-phenyl-1-propene (**1o**) (118.2 mg, 1.0 mmol), the title compound was prepared by following the general

procedure I (100 °C, 16 h, Pd(OAc)<sub>2</sub>, EtOH) as a colorless oil in 35% yield (67.3 mg). The spectroscopic data correspond to those previously reported in the literature.<sup>7,33</sup>

<sup>1</sup>H NMR (700 MHz, CDCl<sub>3</sub>) δ 7.29 (t, *J* = 7.6 Hz, 2H), 7.24-7.18 (m, 3H), 4.07 (d, *J* = 7.1 Hz, 2H), 3.28 (d, *J* = 7.5 Hz, 1H), 2.57 (ddd, *J* = 23.2, 15.0, 7.6 Hz, 2H), 1.30 (d, *J* = 7.0 Hz, 3H), 1.18 (t, *J* = 7.1 Hz, 3H). <sup>13</sup>C NMR (175 MHz, CDCl<sub>3</sub>) δ 172.4, 145.8, 128.5, 126.8, 126.4, 60.3, 43.0, 36.5, 21.8, 14.2.

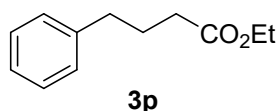

**Ethyl 4-phenylbutanoate (3p)** (Table 5, entries 6-7): From allylbenzene (**1p**) or *trans*-β-Methylstyrene (**1q**) (118.2 mg, 1.0 mmol), the title compound was prepared by following the general procedure I (100 °C, 24 h, Pd(acac)<sub>2</sub>, EtOH) as a colorless oil in 62% yield for **1p** (119.2 mg) or in 42% yield for **1q** (80.7 mg). The spectroscopic data correspond to those previously reported in the literature.<sup>34</sup>

<sup>1</sup>H NMR (700 MHz, CDCl<sub>3</sub>) δ 7.32-7.24 (m, 2H), 7.22-7.14 (m, 3H), 4.12 (q, *J* = 7.1 Hz, 2H), 2.65 (t, *J* = 7.6 Hz, 2H), 2.32 (t, *J* = 7.5 Hz, 2H), 2.03-1.90 (m, 2H), 1.25 (t, *J* = 7.1 Hz, 3H). <sup>13</sup>C NMR (100 MHz, CDCl<sub>3</sub>) δ 173.5, 141.5, 128.5, 128.4, 126.0, 60.3, 35.2, 33.70, 26.6, 14.3.

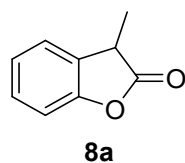

**3-Methylbenzofuran-2(3H)-one (8a)** (Table 6, entry 1): From 2-vinylphenol (**7a**) (60.0 mg, 0.5 mmol), the title compound was prepared by following the general procedure II (60 °C, 48 h, Pd(acac)<sub>2</sub>) as a yellowish white solid in 89% yield (65.9 mg). The spectroscopic data correspond to those previously reported in the literature.<sup>2</sup>

<sup>1</sup>H NMR (400 MHz, CDCl<sub>3</sub>) δ 7.35-7.22 (m, 2H), 7.19-7.06 (m, 2H), 3.73 (q, *J* = 7.5 Hz, 1H), 1.57 (d, *J* = 7.6 Hz, 3H). <sup>13</sup>C NMR (100 MHz, CDCl<sub>3</sub>) δ 178.0, 153.5, 128.8, 128.8, 124.2, 123.9, 110.7, 38.4, 15.9.

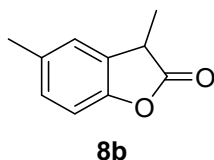

**3,5-Dimethylbenzofuran-2(3H)-one (8b)** (Table 6, entry 2): From 4-methyl-2-vinylphenol (**7b**) (67.1 mg, 0.5 mmol), the title compound was prepared by following the general procedure II (60 °C, 48 h, Pd(acac)<sub>2</sub>) as an oily white solid in 85% yield (68.9 mg). The spectroscopic data correspond to those previously reported in the literature.<sup>35</sup>

<sup>1</sup>H NMR (400 MHz, CDCl<sub>3</sub>) δ 7.15-7.02 (m, 2H), 7.00-6.90 (m, 1H), 3.68 (q, *J* = 7.4 Hz, 1H), 2.35 (s, 3H), 1.55 (d, *J* = 7.6 Hz, 3H). <sup>13</sup>C NMR (100 MHz, CDCl<sub>3</sub>) δ 178.3, 151.4, 133.8, 129.1, 128.7, 124.4, 110.3, 38.5, 21.1, 15.9.

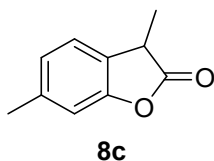

**3,6-Dimethylbenzofuran-2(3H)-one (8c)** (Table 6, entry 3): From 5-methyl-2-vinylphenol (**7c**) (67.1 mg, 0.5 mmol), the title compound was prepared by following the general procedure II (60 °C, 48 h, Pd(acac)<sub>2</sub>) as an oily white solid in 80% yield (64.9 mg). The spectroscopic data correspond to those previously reported in the literature.<sup>2</sup>

<sup>1</sup>H NMR (700 MHz, CDCl<sub>3</sub>) δ 7.12 (d, *J* = 7.6 Hz, 1H), 6.96 (d, *J* = 7.6 Hz, 1H), 6.93 (s, 1H), 3.69 (q, *J* = 7.6 Hz, 1H), 2.38 (s, 3H), 1.55 (d, *J* = 7.6 Hz, 3H). <sup>13</sup>C NMR (175 MHz, CDCl<sub>3</sub>) δ 178.4, 153.6, 139.2, 125.7, 124.8, 123.5, 111.4, 38.3, 21.7, 16.0.

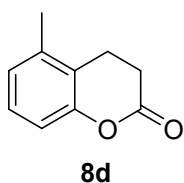

**5-Methylchroman-2-one (8d)** (Table 6, entry 4): From 3-methyl-2-vinylphenol (**7d**) (67.1 mg, 0.5 mmol), the title compound was prepared by following the general procedure II (60 °C, 48 h, Pd(acac)<sub>2</sub>) as an oily white solid in 68% yield (55.1 mg). The spectroscopic data correspond to those previously reported in the literature.<sup>36</sup>

<sup>1</sup>H NMR (700 MHz, CDCl<sub>3</sub>) δ 7.14 (t, *J* = 7.9 Hz, 1H), 6.97 (d, *J* = 7.6 Hz, 1H), 6.89 (d, *J* = 8.1 Hz, 1H), 2.93 (t, *J* = 7.4 Hz, 2H), 2.77 (t, *J* = 7.4 Hz, 2H), 2.31 (s, 3H). <sup>13</sup>C NMR (175 MHz, CDCl<sub>3</sub>) δ 168.6, 152.1, 136.3, 127.7, 125.9, 121.2, 114.7, 28.8, 20.7, 19.2. HRMS (ESI+, *m/z*): calculated for C<sub>10</sub>H<sub>11</sub>O<sub>2</sub> [M+H]<sup>+</sup> 163.0759; found 163.0754.

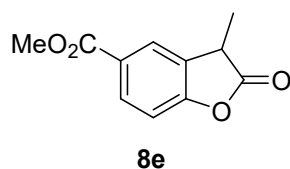

**Methyl 3-methyl-2-oxo-2,3-dihydrobenzofuran-5-carboxylate (8e)** (Table 6, entry 5): From methyl 4-hydroxy-3-vinylbenzoate (**7e**) (89.0 mg, 0.5 mmol), the title compound was prepared by following the general procedure II (100 °C, 24 h, Pd(acac)<sub>2</sub>) as an oily white solid in 80% yield (82.5 mg). The spectroscopic data correspond to those previously reported in the literature.<sup>2</sup>

<sup>1</sup>H NMR (400 MHz, CDCl<sub>3</sub>) δ 8.05 (d, *J* = 8.4 Hz, 1H), 7.97 (s, 1H), 7.16 (d, *J* = 8.4 Hz, 1H), 3.93 (s, 3H), 3.78 (q, *J* = 7.6 Hz, 1H), 1.61 (d, *J* = 7.6 Hz, 3H). <sup>13</sup>C NMR (100 MHz, CDCl<sub>3</sub>) δ 177.1, 166.3, 156.9, 131.3, 129.0, 126.5, 125.6, 110.6, 52.3, 38.1, 15.8.

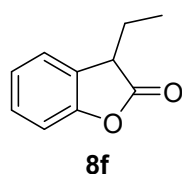

**3-Ethylbenzofuran-2(3H)-one (8f)** (Table 6, entries 6-7): From 2-allylphenol (**7f**) (134.2mg, 1.0 mmol) or β-methyl-vinylphenol (**7g**) (67.1mg, 0.5 mmol), the title



compound was prepared by following general procedure II (100 °C, 16 h or 24 h, Pd(acac)<sub>2</sub>) as a colorless oil in 78% yield (126.4 mg) for **7f** or in 37% yield (30.0 mg) for **7g**. The spectroscopic data correspond to those previously reported in the literature.<sup>2</sup>

<sup>1</sup>H NMR (400 MHz, CDCl<sub>3</sub>) δ 7.33-7.26 (m, 2H), 7.20-7.13 (m, 1H), 7.10 (d, *J* = 8.0 Hz, 1H), 3.71 (t, *J* = 5.9 Hz, 1H), 2.13-1.99 (m, 2H), 0.97 (t, *J* = 7.4 Hz, 3H). <sup>13</sup>C NMR (100 MHz, CDCl<sub>3</sub>) δ 177.2, 153.9, 128.8, 127.2, 124.2, 124.1 110.7, 44.6, 24.3, 10.2.

## 7. References

1. N. Baret, J.-P. Dulcere, J. Rodriguez, J.-M. Pons and R. Faure, *Eur. J. Org. Chem.*, 2000, **2000**, 1507-1516.
2. V. Hirschbeck and I. Fleischer, *Chem. Eur. J.*, 2018, **24**, 2854-2857.
3. A. Seoane, N. Casanova, N. Quiñones, J. L. Mascareñas and M. Gulías, *J. Am. Chem. Soc.*, 2014, **136**, 834-837.
4. I. Fleischer and J. Pospech, *RSC Adv.*, 2015, **5**, 493-496.
5. R. P. Adams, P. S. Beauchamp, V. Dev and S. M. Dutz, *J. Essent. Oil Res.*, 2007, **19**, 146-152.
6. H. Konishi, T. Ueda, T. Muto and K. Manabe, *Org. Lett.*, 2012, **14**, 4722-4725.
7. S. S. Sohn and J. W. Bode, *Org. Lett.*, 2005, **7**, 3873-3876.
8. H. Nambu, K. Hata, M. Matsugi and Y. Kita, *Chem. Eur. J.*, 2005, **11**, 719-727.
9. C. Peng, W. Zhang, G. Yan and J. Wang, *Org. Lett.*, 2009, **11**, 1667-1670.
10. P. H. Gehrtz, V. Hirschbeck and I. Fleischer, *Chem. Commun.*, 2015, **51**, 12574-12577.
11. M. D. Hossain and T. Kitamura, *Synthesis*, 2006, **2006**, 1253-1256.
12. J. M. Concellón and M. Huerta, *J. Org. Chem.*, 2005, **70**, 4714-4719.
13. M. Amatore, C. Gosmini and J. Périchon, *J. Org. Chem.*, 2006, **71**, 6130-6134.
14. C. Liu, C. He, W. Shi, M. Chen and A. Lei, *Org. Lett.*, 2007, **9**, 5601-5604.
15. R. Mueller, J. Yang, C. Duan, E. Pop, O. J. Geoffroy, L. H. Zhang, T.-B. Huang, S. Denisenko, B. H. McCosar, D. C. Oniciu, C. L. Bisgaier, M. E. Pape, C. D. Freiman, B. Goetz, C. T. Cramer, K. L. Hopson and J.-L. H. Dasseux, *J. Med. Chem.*, 2004, **47**, 6082-6099.
16. Y. Kita, Y. Nishii, A. Onoue and K. Mashima, *Adv. Synth. Catal.*, 2013, **355**, 3391-3395.
17. A. Grabulosa, J. J. R. Frew, J. A. Fuentes, A. M. Z. Slawin and M. L. Clarke, *J. Mol. Catal. A: Chem.*, 2010, **330**, 18-25.
18. C. Salomé and H. Kohn, *Tetrahedron*, 2009, **65**, 456-460.
19. S. Chandrasekhar, G. Pavan Kumar Reddy, C. Nagesh and C. Raji Reddy, *Tetrahedron Lett.*, 2007, **48**, 1269-1271.
20. G. S. Coumbarides, M. Dingjan, J. Eames, A. Flinn and J. Northen, *J. Labelled Compd. Radiopharm.*, 2006, **49**, 903-914.
21. D. Leow, G. Li, T.-S. Mei and J.-Q. Yu, *Nature*, 2012, **486**, 518-522.
22. B. A. Sandoval, A. J. Meichan and T. K. Hyster, *J. Am. Chem. Soc.*, 2017, **139**, 11313-11316.
23. E. W. H. Ng, K.-H. Low and P. Chiu, *J. Am. Chem. Soc.*, 2018, **140**, 3537-3541.
24. Y.-S. Feng, W. Wu, Z.-Q. Xu, Y. Li, M. Li and H.-J. Xu, *Tetrahedron*, 2012, **68**, 2113-2120.
25. X.-S. Zhang, Q.-L. Zhu, Y.-F. Zhang, Y.-B. Li and Z.-J. Shi, *Chem. Eur. J.*, 2013, **19**, 11898-11903.
26. N. A. Strotman, S. Sommer and G. C. Fu, *Angew. Chem. Int. Ed.*, 2007, **46**, 3556-3558.
27. B. M. Nestl, S. M. Glueck, M. Hall, W. Kroutil, R. Stuermer, B. Hauer and K. Faber, *Eur. J. Org. Chem.*, 2006, **2006**, 4573-4577.
28. S. Condon, D. Dupré, G. Falgayrac and J.-Y. Nédélec, *Eur. J. Org. Chem.*, 2002, **2002**, 105-111.
29. M. Zysk, A. Zadlo, A. Brodzka, C. Wisniewska and R. Ostaszewski, *J. Mol. Catal. B: Enzym.*, 2014, **102**, 225-229.
30. Z. Deng, S. Han, M. Ke, Y. Ning and F.-E. Chen, *Chem. Commun.*, 2022, **58**, 3921-3924.
31. C. Hardouin, M. J. Kelso, F. A. Romero, T. J. Rayl, D. Leung, I. Hwang, B. F. Cravatt and D. L. Boger, *J. Med. Chem.*, 2007, **50**, 3359-3368.

32. I. Fleischer, R. Jennerjahn, D. Cozzula, R. Jackstell, R. Franke and M. Beller, *ChemSusChem*, 2013, **6**, 417-420.
33. C. Metallinos, J. Zaifman, L. Van Belle, L. Dodge and M. Pilkington, *Organometallics*, 2009, **28**, 4534-4543.
34. D. A. Everson, R. Shrestha and D. J. Weix, *J. Am. Chem. Soc.*, 2010, **132**, 920-921.
35. M. Wang, X. Zhang, Z. Ling, Z. Zhang and W. Zhang, *Chem. Commun.*, 2017, **53**, 1381-1384.
36. Y. Gu and K. Xue, *Tetrahedron Lett.*, 2010, **51**, 192-196.

## 8. NMR Spectra

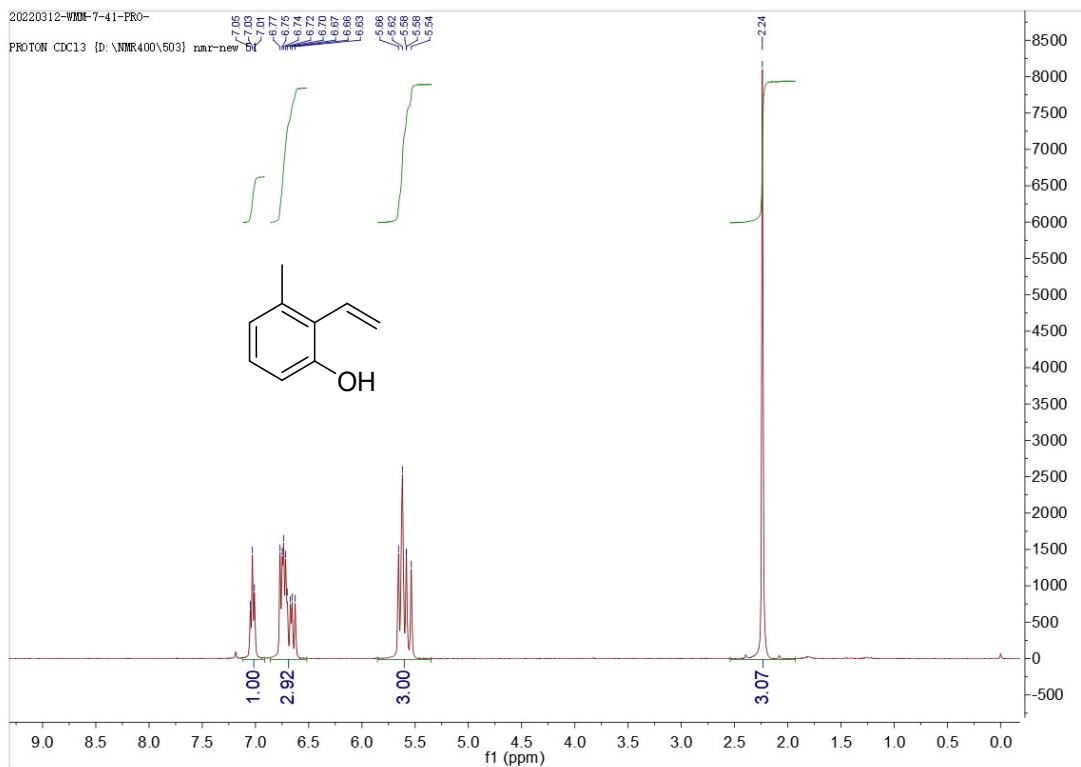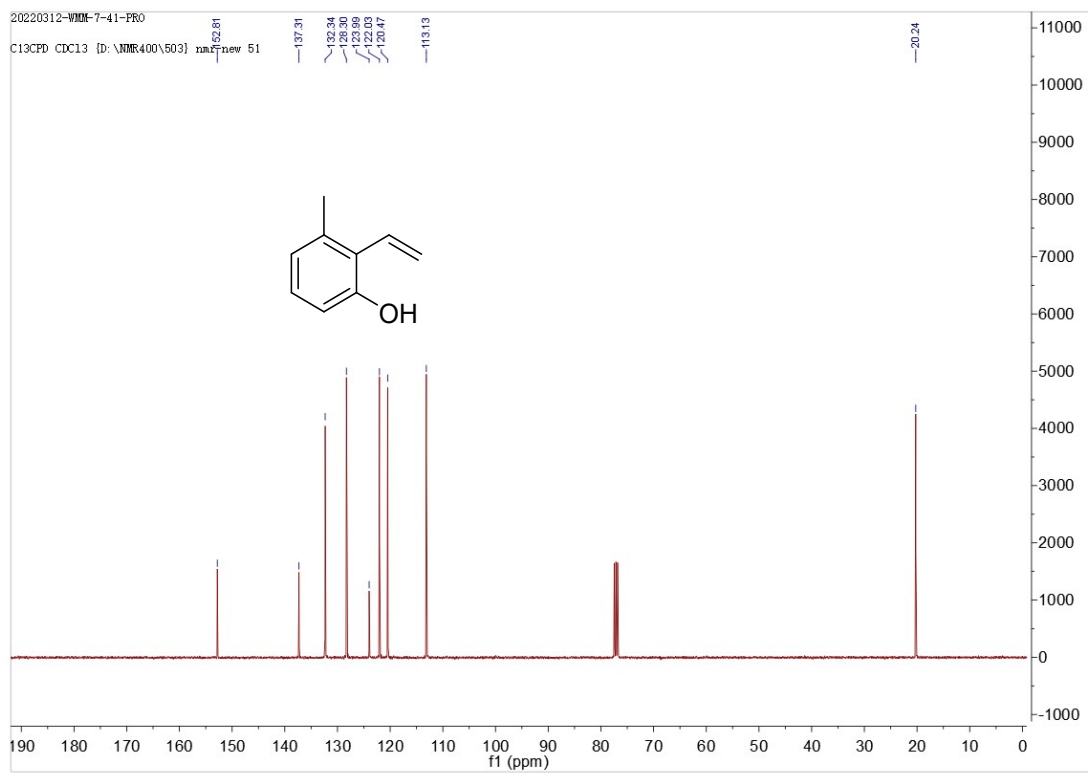

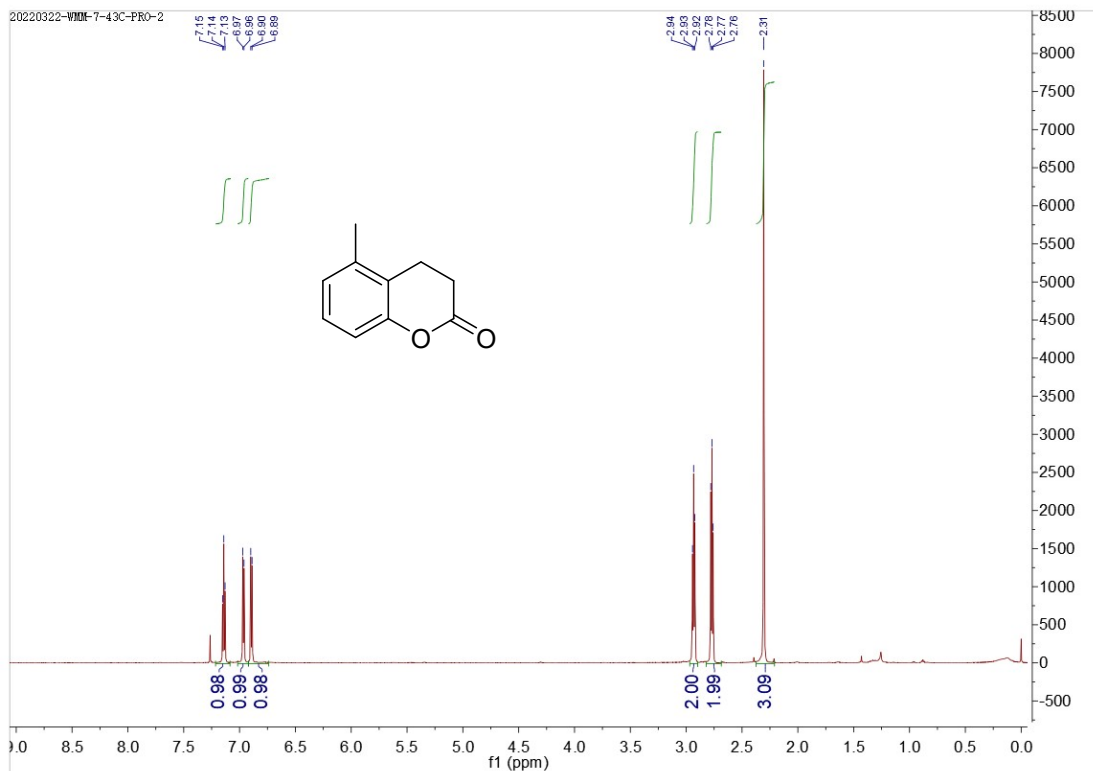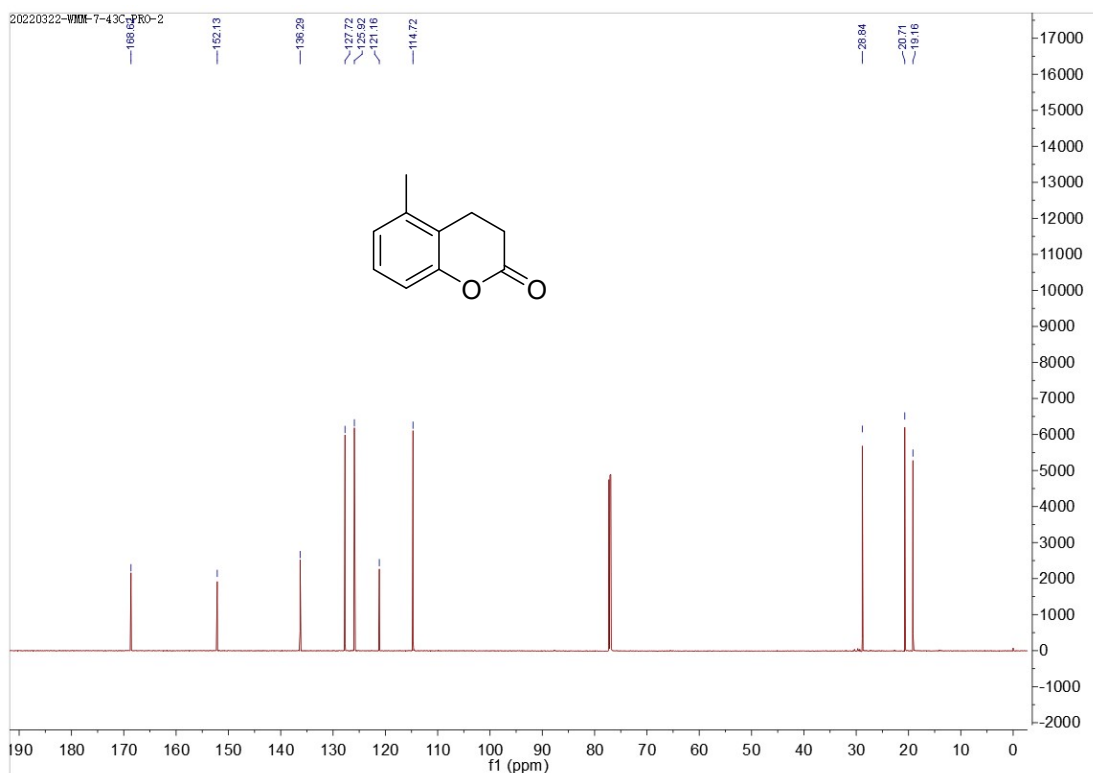

Supplement: d3sc01114c1.pdf [file d3sc01114c1.pdf]
